# Supplementary material
Source: publisher figshare collection journal article supplement (https://sage.figshare.com/ndownloader/files/27995823)
Supplement: Supplementary file 1 [file 27995823]

## Sheet: Supplementary Table 1
	Supplementary Table 1
	Comparing Pediatric Private Insurance and Medicaid Enrollment from 2002-2014
		2002	2004	2006	2008	2010	2012	2014	Overall Growth
	Private Insurance Enrollees	5.18363e+07	5.03232e+07	4.93309e+07	4.84877e+07	4.47086e+07	4.44596e+07	4.40392e+07	-0.150515
	Medicaid Enrollees	2.05772e+07	2.27741e+07	2.32844e+07	2.38348e+07	2.72296e+07	2.87893e+07	3.09514e+07	0.502523

## Sheet: Supplementary Table 2
	Supplementary Table 2
	Comparing Overall, Private Insurance, and Medicaid Pediatric Total and Per Capita Personal Health Care Spending from 2002-2014
			2002	2004	2006	2008	2010	2012	2014	Overall Growth	Annual Growtha	Adjusted 2014 Spendingb	Adjusted Annual Growthc
	TOTAL SPENDING (USD, millions)	Overall Pediatric PHC Spending	155791	185830	214240	237463	258673	275651	291174	0.869004	0.0534991	191073	0.017157
		Private Insurance Pediatric PHC Spending	52251	64464	74835	83108	88210	95855	98868	0.892174	0.0545814	64878.6	0.0182019
		Medicaid Pediatric PHC Spending	53542	62720	73532	82659	94623	98776	109444	1.04408	0.0613895	71818.7	0.0247752
	PER CAPITA SPENDING (USD)	Overall Pediatric PHC Spending	2020	2395	2742	3018	3295	3537	3749	0.855941	0.0528835	2460.14	0.0165624
		Private Insurance Pediatric PHC Spending	1008	1281	1517	1714	1973	2156	2245	1.22718	0.0690048	1473.2	0.0321277
		Medicaid Pediatric PHC Spending	2602	2754	3158	3468	3475	3431	3536	0.358955	0.0258891	2320.37	-0.00950072
	aCompounded Annual Growth Rate
	bAdjusted for Medical-Cost Inflation
	cCalculated Using Adjusted 2014 Spending
	PHC, personal health care

## Sheet: Supplementary Table 3
	Supplementary Table 3
	Comparing Pediatric Private Insurance and Medicaid Spending (in millions) by Service (and percentage of total spending directed toward each service) from 2002-2014
			2002		2004		2006		2008		2010		2012		2014		Overall Growth	Annual Growtha	Adjusted 2014 Spendingb	Adjusted Annual Growthc
	PRIVATE INSURANCE	Hospital Care	17814	0.340931	21665	0.336079	27510	0.367609	30811	0.370734	34944	0.396146	38990	0.40676	40230	0.406906	1.25834	0.070243	26399.5	0.0333232
		Physician and Clinical Services	16771	0.32097	21223	0.329223	22878	0.305713	26217	0.315457	26667	0.302313	28543	0.297773	28723	0.290519	0.712659	0.0458576	18848.4	0.00977908
		Other Professional Services	2050	0.0392337	2243	0.0347946	2363	0.0315761	2626	0.0315974	2753	0.0312096	3398	0.0354494	3421	0.0346017	0.66878	0.0435981	2244.9	0.00759714
		Dental Services	8933	0.170963	11167	0.173228	12734	0.170161	13249	0.159419	12610	0.142954	13265	0.138386	13537	0.13692	0.515392	0.0352465	8883.17	-0.000466042
		Other Health Residential and Personal Care	502	0.00960747	699	0.0108433	791	0.0105699	894	0.0107571	1038	0.0117674	1146	0.0119556	1179	0.011925	1.34861	0.0737442	773.67	0.036703
		Home Health Care	817	0.0156361	834	0.0129375	694	0.00927374	602	0.00724359	579	0.00656388	777	0.00810599	1011	0.0102258	0.237454	0.0179132	663.43	-0.0172016
		Nursing Care Facilities and Continuing Care Retirement Communities	47	0.000899504	44	0.000682552	28	0.000374156	32	0.000385041	27	0.000306088	41	0.000427729	42	0.000424809	-0.106383	-0.00932937	27.56	-0.043507
		Prescription Drugs	4950	0.094735	6181	0.095883	7451	0.0995657	8177	0.09839	8879	0.100658	8898	0.0928277	9793	0.0990513	0.978384	0.0585041	6426.3	0.0219892
		Durable Medical Equipment	365	0.00698551	408	0.00632911	386	0.00515801	500	0.00601627	712	0.00807165	796	0.00830421	933	0.00943682	1.55616	0.0813486	612.24	0.0440446
		Total PHC Spending	52251	1	64464	1	74835	1	83108	1	88210	1	95855	1	98868	1	0.892174	0.0545814	64878.6	0.0182019
	MEDICAID	Hospital Care	27695	0.517257	32070	0.51132	38174	0.519148	42619	0.515647	47618	0.503239	48943	0.495495	52755	0.482027	0.904856	0.0551686	34618.6	0.0187689
		Physician and Clinical Services	9320	0.174069	11001	0.175399	12935	0.17591	13921	0.168403	16624	0.175687	17694	0.179133	21373	0.195287	1.29324	0.0716117	14025.3	0.0346448
		Other Professional Services	1154	0.0215532	1442	0.0229911	1646	0.0223848	1919	0.0232142	2423	0.0256069	2344	0.0237305	2779	0.025392	1.40815	0.0759867	1823.62	0.0388688
		Dental Services	2084	0.0389227	2590	0.0412946	2932	0.0398738	3726	0.0450735	5017	0.0530209	5041	0.0510347	5301	0.0484357	1.54367	0.080907	3478.59	0.0436194
		Other Health Residential and Personal Care	5533	0.103339	5765	0.0919165	6934	0.0942991	7991	0.0966673	8950	0.0945859	8861	0.089708	9510	0.0868938	0.718778	0.0461685	6240.59	0.0100792
		Home Health Care	2109	0.0393896	2496	0.0397959	3416	0.046456	4691	0.0567471	5674	0.0599643	6372	0.0645096	6979	0.0637678	2.30915	0.104866	4579.72	0.0667522
		Nursing Care Facilities and Continuing Care Retirement Communities	321	0.00599529	390	0.00621811	445	0.00605179	493	0.00596383	593	0.00626698	670	0.00678302	763	0.0069716	1.37695	0.0748181	500.69	0.0377402
		Prescription Drugs	4557	0.0851108	6153	0.0981027	5912	0.0804004	6057	0.0732716	6277	0.0663369	7250	0.0733984	8159	0.0745495	0.790432	0.0497354	5354.05	0.013523
		Durable Medical Equipment	769	0.0143626	813	0.0129624	1139	0.0154899	1241	0.0150124	1446	0.0152817	1602	0.0162185	1825	0.0166752	1.37321	0.0746772	1197.59	0.0376044
		Total PHC Spending	53542	1	62720	1	73532	1	82659	1	94623	1	98776	1	109444	1	1.04408	0.0613895	71818.7	0.0247752
	aCompounded Annual Growth Rate
	bAdjusted for Medical-Cost Inflation
	cCalculated Using Adjusted 2014 Spending
	PHC, personal health care

## Sheet: Supplementary Table 4
	Supplementary Table 4
	Comparing Pediatric Private Insurance and Medicaid Per Capita Spending by Service (and percentage of total spending directed toward each service) from 2002-2014
			2002		2004		2006		2008		2010		2012		2014		Overall Growth	Annual Growth	Adjusted 2014 Spendingb	Adjusted Annual Growthc
	PRIVATE INSURANCE	Hospital Care	343.659	0.340931	430.517	0.336079	557.662	0.367609	635.439	0.370734	781.595	0.396146	876.975	0.40676	913.504	0.406906	1.65817	0.0848806	599.78	0.0475033
		Physician and Clinical Services	323.538	0.32097	421.734	0.329223	463.766	0.305713	540.693	0.315457	596.463	0.302313	641.998	0.297773	652.214	0.290519	1.01588	0.0601617	427.85	0.0235614
		Other Professional Services	39.5476	0.0392337	44.5719	0.0347946	47.901	0.0315761	54.158	0.0315974	61.5766	0.0312096	76.4289	0.0354494	77.6808	0.0346017	0.964237	0.0578713	51.18	0.0217196
		Dental Services	172.331	0.170963	221.906	0.173228	258.134	0.170161	273.244	0.159419	282.049	0.142954	298.36	0.138386	307.385	0.13692	0.783692	0.0494054	201.45	0.0130954
		Other Health Residential and Personal Care	9.68433	0.00960747	13.8902	0.0108433	16.0346	0.0105699	18.4376	0.0107571	23.217	0.0117674	25.7762	0.0119556	26.7716	0.011925	1.76442	0.0884297	17.71	0.0515883
		Home Health Care	15.7612	0.0156361	16.5729	0.0129375	14.0683	0.00927374	12.4155	0.00724359	12.9505	0.00656388	17.4765	0.00810599	22.9568	0.0102258	0.456545	0.0318351	15.09	-0.00361976
		Nursing Care Facilities and Continuing Care Retirement Communities	0.9067	0.000899504	0.874348	0.000682552	0.567595	0.000374156	0.659961	0.000385041	0.603911	0.000306088	0.922185	0.000427729	0.953696	0.000424809	0.0518313	0.00421994	0.65	-0.0273555
		Prescription Drugs	95.4929	0.094735	122.826	0.095883	151.041	0.0995657	168.641	0.09839	198.597	0.100658	200.137	0.0928277	222.37	0.0990513	1.32866	0.0729812	145.67	0.0358175
		Durable Medical Equipment	7.0414	0.00698551	8.10759	0.00632911	7.82471	0.00515801	10.3119	0.00601627	15.9254	0.00807165	17.9039	0.00830421	21.1857	0.00943682	2.00873	0.0961381	13.78	0.0575458
		Total PHC Spending	1008	1	1281	1	1517	1	1714	1	1973	1	2156	1	2245	1	1.22718	0.0690048	1473.2	0.0321277
	MEDICAID	Hospital Care	1345.9	0.517257	1408.18	0.51132	1639.47	0.519148	1788.1	0.5156	1748.76	0.503239	1700.04	0.495495	1704.45	0.482027	0.266397	0.0198763	1118.18	-0.0153283
		Physician and Clinical Services	452.927	0.174069	483.048	0.175399	555.523	0.17591	584.063	0.168415	610.511	0.175687	614.604	0.179133	690.535	0.195287	0.524604	0.0357695	453.44	9.42596e-05
		Other Professional Services	56.0814	0.0215532	63.3174	0.0229911	70.6912	0.0223848	80.5126	0.0232159	88.9839	0.0256069	81.4192	0.0237305	89.786	0.025392	0.600996	0.0399981	59.05	0.00430768
		Dental Services	101.277	0.0389227	113.725	0.0412946	125.921	0.0398738	156.326	0.0450768	184.248	0.0530209	175.1	0.0510347	171.269	0.0484357	0.691094	0.0447538	112.21	0.0085794
		Other Health Residential and Personal Care	268.889	0.103339	253.138	0.0919165	297.796	0.0942991	335.266	0.0966743	328.686	0.0945859	307.788	0.089708	307.256	0.0868938	0.142687	0.0111772	201.45	-0.023776
		Home Health Care	102.492	0.0393896	109.598	0.0397959	146.708	0.046456	196.813	0.0567512	208.376	0.0599643	221.332	0.0645096	225.483	0.0637678	1.20001	0.0679117	147.64	0.0308834
		Nursing Care Facilities and Continuing Care Retirement Communities	15.5998	0.00599529	17.1247	0.00621811	19.1115	0.00605179	20.6841	0.00596426	21.7777	0.00626698	23.2726	0.00678302	24.6516	0.0069716	0.580255	0.0388685	16.4	0.00417755
		Prescription Drugs	221.458	0.0851108	270.175	0.0981027	253.904	0.0804004	254.124	0.073277	230.521	0.0663369	251.83	0.0733984	263.607	0.0745495	0.190325	0.0146248	173.24	-0.020255
		Durable Medical Equipment	37.3714	0.0143626	35.6984	0.0129624	48.917	0.0154899	52.0668	0.0150135	53.1039	0.0152817	55.6457	0.0162185	58.9635	0.0166752	0.577772	0.0387324	38.71	0.00293706
		Total PHC Spending	2602	1	2754	1	3158	1	3468	1	3475	1	3431	1	3536	1	0.358955	0.0258891	2320.37	-0.00950072
	aCompounded Annual Growth Rate
	bAdjusted for Medical-Cost Inflation
	cCalculated Using Adjusted 2014 Spending
	PHC, personal health care
